# Supplementary material for: Mucus-on-a-chip: investigating the barrier properties of mucus with organic bioelectronics
Source: Royal Society of Chemistry journal article supplement (doi:10.1039/d4tb01351d), 2024-11-22
Supplement: d4tb01351d1.pdf [file d4tb01351d1.pdf]

1

## Supplementary Information

2 **Mucus-on-a-chip: Investigating the barrier properties of mucus with organic**  
3 **bioelectronics**

4 *Reece McCoy<sup>1,2</sup>, Kaixin Wang<sup>1</sup>, Jeremy Treiber<sup>3</sup>, Ying Fu<sup>4</sup>, George G. Malliaras<sup>2</sup>,*  
5 *Alberto Salleo<sup>3</sup>, Róisín M. Owens<sup>1\*</sup>*

6 1 Department of Chemical Engineering and Biotechnology, University of Cambridge, CB3 0AS  
7 Cambridge, United Kingdom

8 2 Department of Electrical Engineering, University of Cambridge, CB3 0FA, Cambridge, United  
9 Kingdom

10 3 Department of Materials Science and Engineering, Stanford University, Stanford, CA, USA

11 4 Department of Pure and Applied Chemistry, University of Strathclyde, G1 1XQ, Glasgow, UK

12 \*Corresponding author

13

14

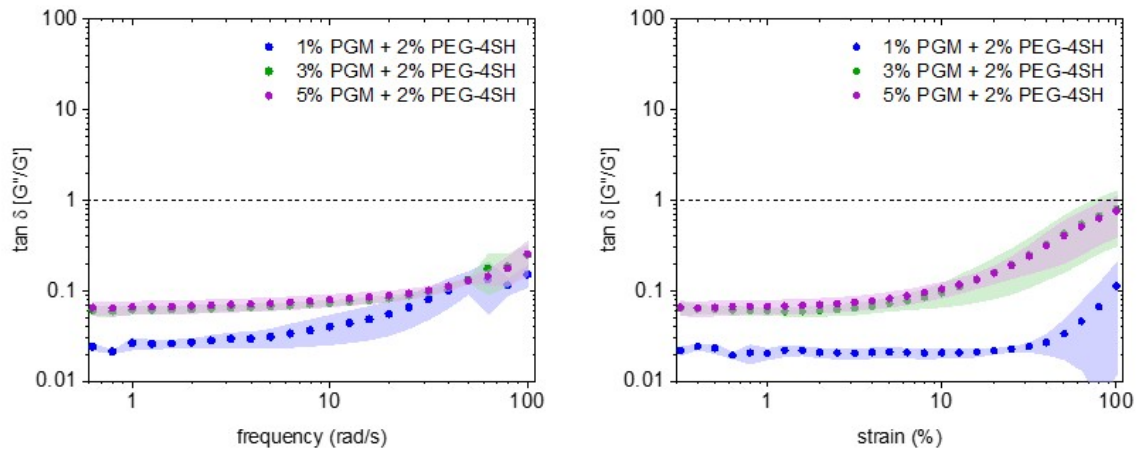

15

16 **Supplementary Figure 1.** Graph of loss factor,  $\tan \delta$ , defined as the ratio of  $G''$  to  $G'$ , for  
17 frequency sweep and strain sweep. Graphs are supplementary to Figure 1C and 1D within  
18 the main text. Dominant elasticity is observed across the entire region investigated where  
19 the loss factor remains below the flow point, denoted by the dashed line at  $\tan(\delta) = 1$  in both  
20 graphs.

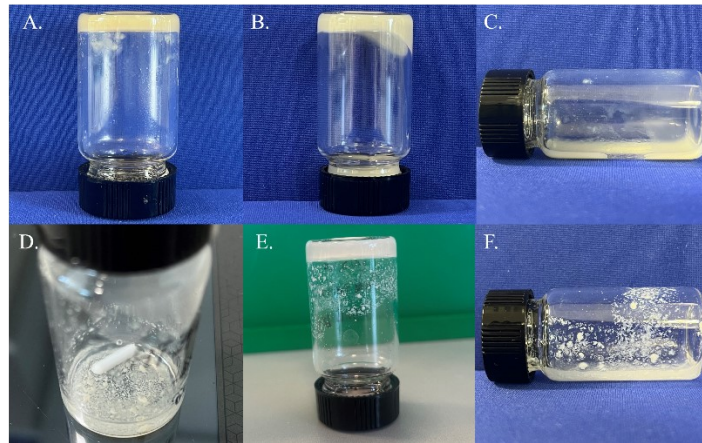

21

22 **Supplementary Figure 2.** A-C Images of semi-synthetic PGM-PEG-4SH mucus upon gelation, post  
23 90 minutes NAC treatment and post 24 h NAC treatment (these first three images are provided in  
24 the main text Figure 3D but repeated here for ease of comparison). D-F Images of mucus extracted  
25 from HT-29-MTX cells upon addition of PEG-4SH showing before gelation, post gelation and 24 h  
26 post NAC treatment. Visible aggregates are observed in the HT29-MTX crosslinked mucus gel  
27 showing higher heterogeneity than the PGM equivalent.

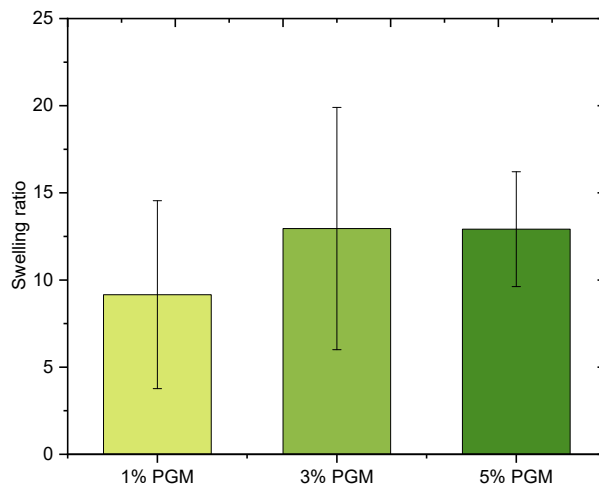

28

29 **Supplementary Figure 3.** Graph of swelling ratio for semi-synthetic mucus gels with varying  
30 PGM percentage. Error bars show standard deviation from  $n = 3$  independently prepared  
31 gels at each PGM concentration investigated.

32

33 To determine swelling ratios, each samples were prepared in 2 mL quantities and allowed to  
34 gel overnight. 5 mL PBS was added to each sample and allowed to equilibrate overnight.  
35 Excess PBS was discarded and the wet samples weighed ( $M_w$ ) before undergoing  
36 lyophilisation. The dried mass ( $M_d$ ) was then measured. The swelling ratio was determined  
37 by calculating the relative mass increase due to water intake to the dry mass (swelling ratio  
38 =  $(M_w - M_d) / M_d$ ).

39

40

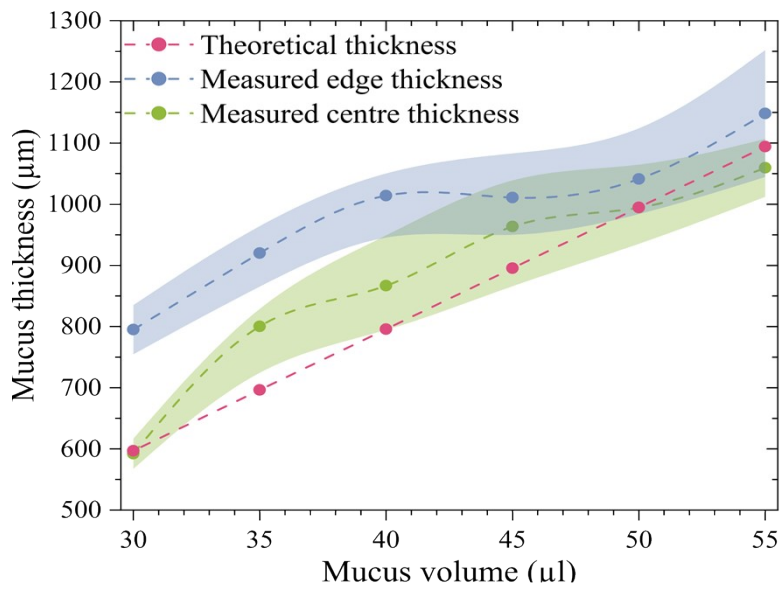

41

42 **Supplementary Figure 4.** Thickness of mucus corresponding to volumes of mucus added to  
43 the well atop the microelectrode arrays. Difference observed on outer electrodes vs inner  
44 electrodes due to wetting of the well wall by the mucus leading to a concave meniscus. Error

45 band denotes standard deviation.

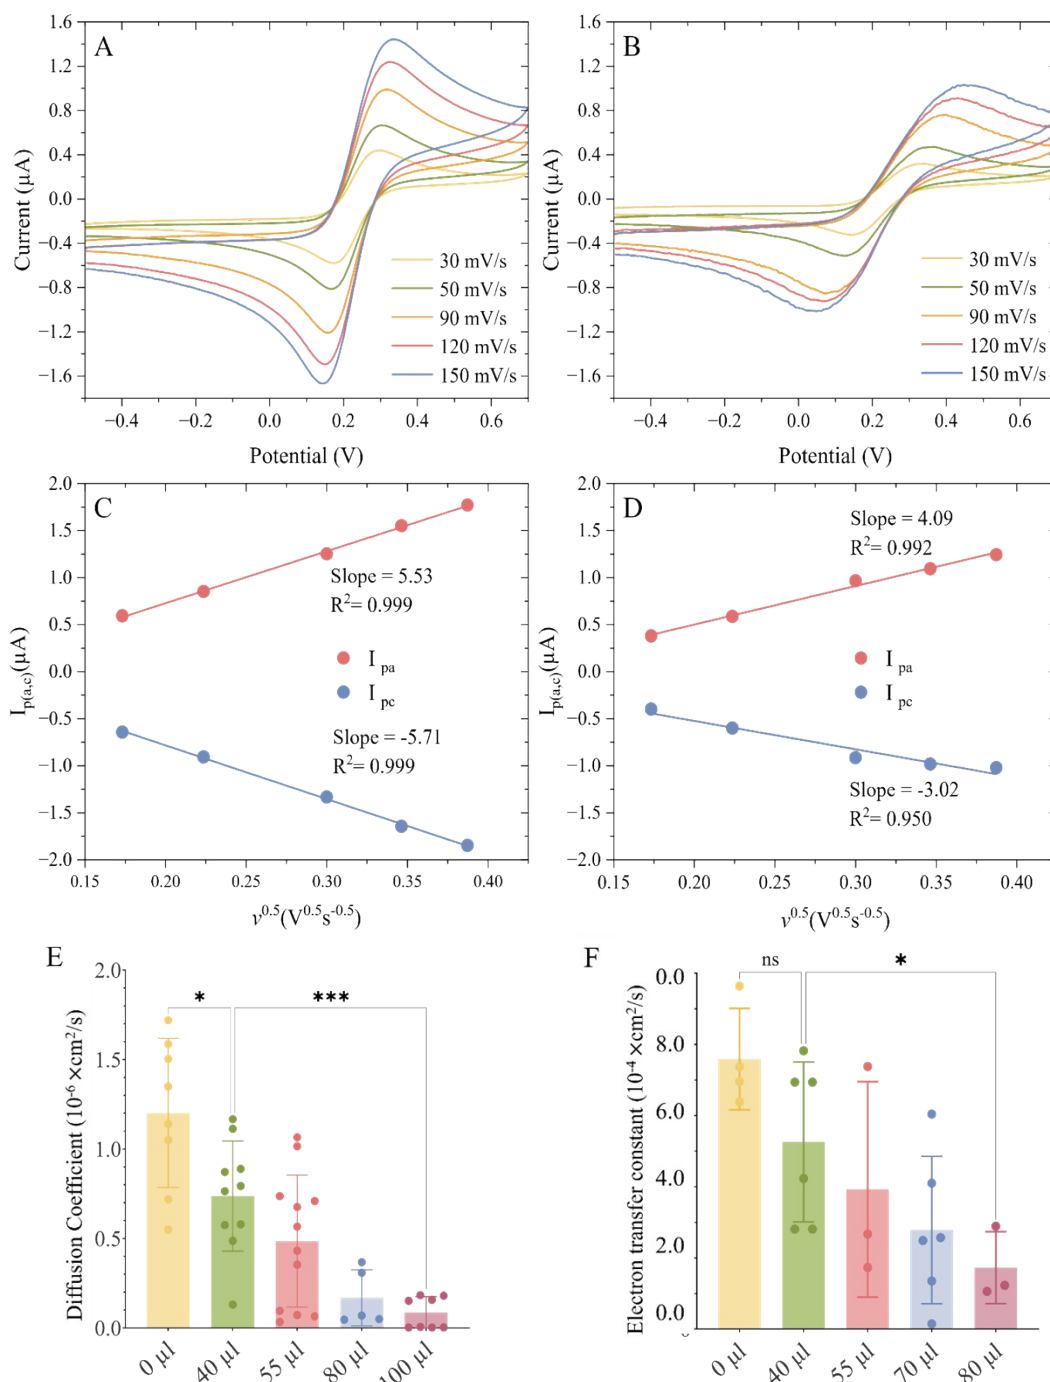

46

47 **Supplementary Figure 5.** Cyclic voltammetry (scan rates 30, 50, 90, 120, and 150 mV/s) of  
 48 10 mM  $[\text{Fe}(\text{CN})_6]^{3-/4-}$  with 0.1 M KCl, in phosphate-buffered saline carried out with A. 55  $\mu\text{L}$   
 49 and B. 70  $\mu\text{L}$  mucus, (5 % PGM + 2 % PEG) coated on the electrode surface. C. Anodic and  
 50 cathodic current peak positions extracted from A as a function of the square root of the  
 51 scan rates. D: Anodic and cathodic current peak positions extracted from B as a function of

52 the square root of the scan rates. E and F: Diffusion coefficient and electron transfer rate  
 53 constant of ferricyanide molecules through mucus layer computed from CV measurement.

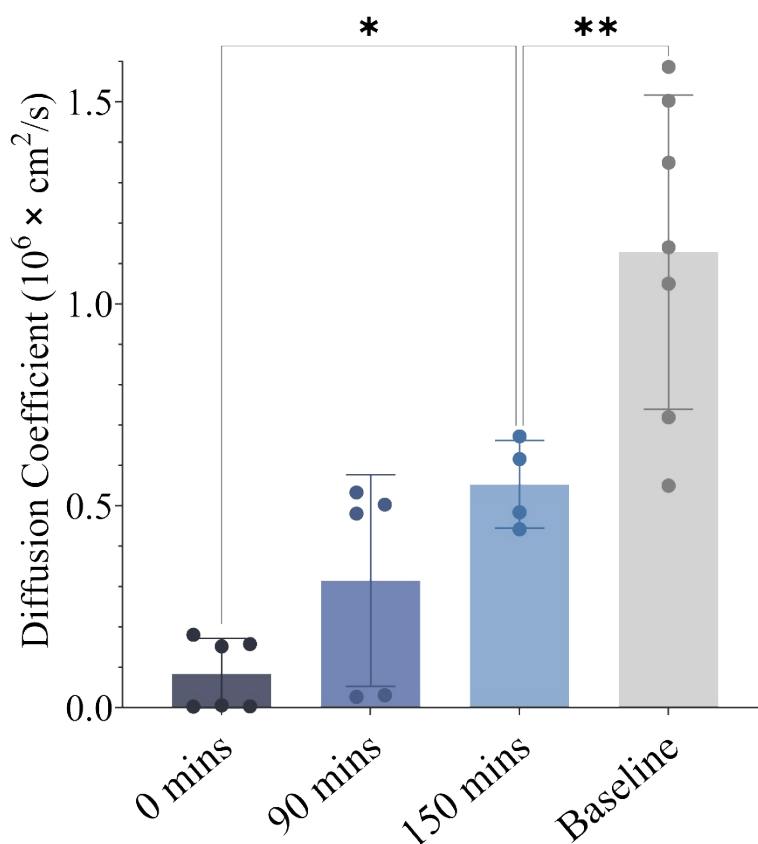

54

55 **Supplementary Figure 6.** Diffusion coefficient (10<sup>6</sup>×cm<sup>2</sup>/s) change after NAC treatment  
 56 calculated from CV data using the Randles-Sevcik which describes the relationship between  
 57 the scan rate (v) in CV to the peak current (I<sub>p</sub>). which can be employed to calculate the  
 58 diffusion coefficient of the reversible redox probe from a CV curve:

59

$$I_p = 0.4463nFAC^0\left(\frac{nFvD}{RT}\right)^{0.5}$$

60

61 I<sub>p</sub>= the cathodic or anodic peak current (μA)

62 n= number of electrons transferred in the redox event (n = 1 for ferricyanide ions)

63 F= Faraday's constant (96485.34 C/mol)

64 A= electrode surface area (cm<sup>2</sup>)

65 C<sup>0</sup>= bulk concentration of the redox probe species (mol/cm<sup>3</sup>)

66 v= scan rate (V/s)

67 D= diffusion coefficient of K<sub>3</sub>[Fe(CN)<sub>6</sub>] ions (cm<sup>2</sup>/s)

68 R= ideal gas constant (8.314 J/(K·mol))

69 T= absolute temperature (K)

70

71

72

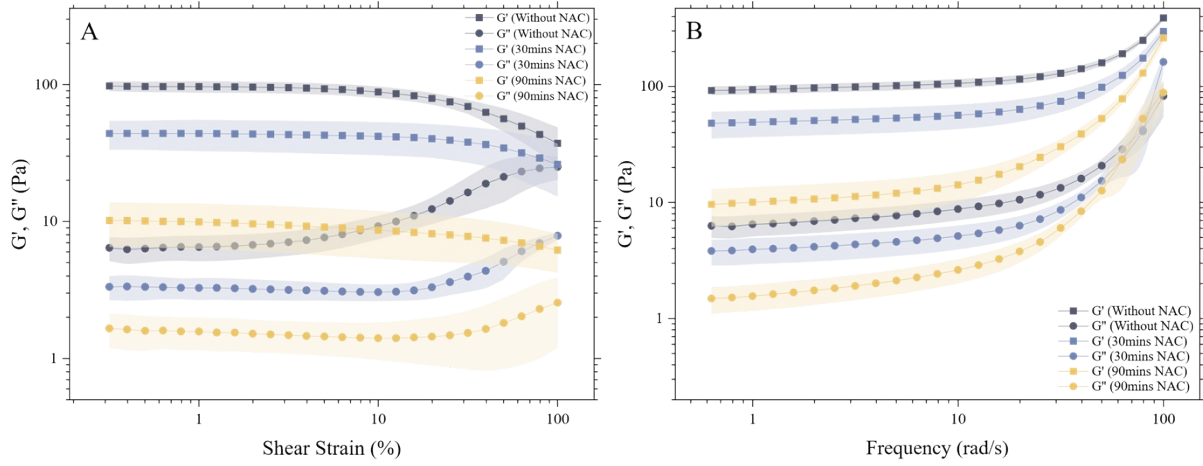

73

74 **Supplementary Figure 7. A.** Bulk rheological measurements of synthetic mucus with exposure

75 to 50 mM N-acetyl-L-cysteine..  $G'$  represents elastic modulus (squares) and  $G''$  represents

76 viscous modulus (circles). B. Frequency sweep at strain=1% from 0.1 to 100 rad/s;

77

78

79

80

81

82

83

84

85

86

87



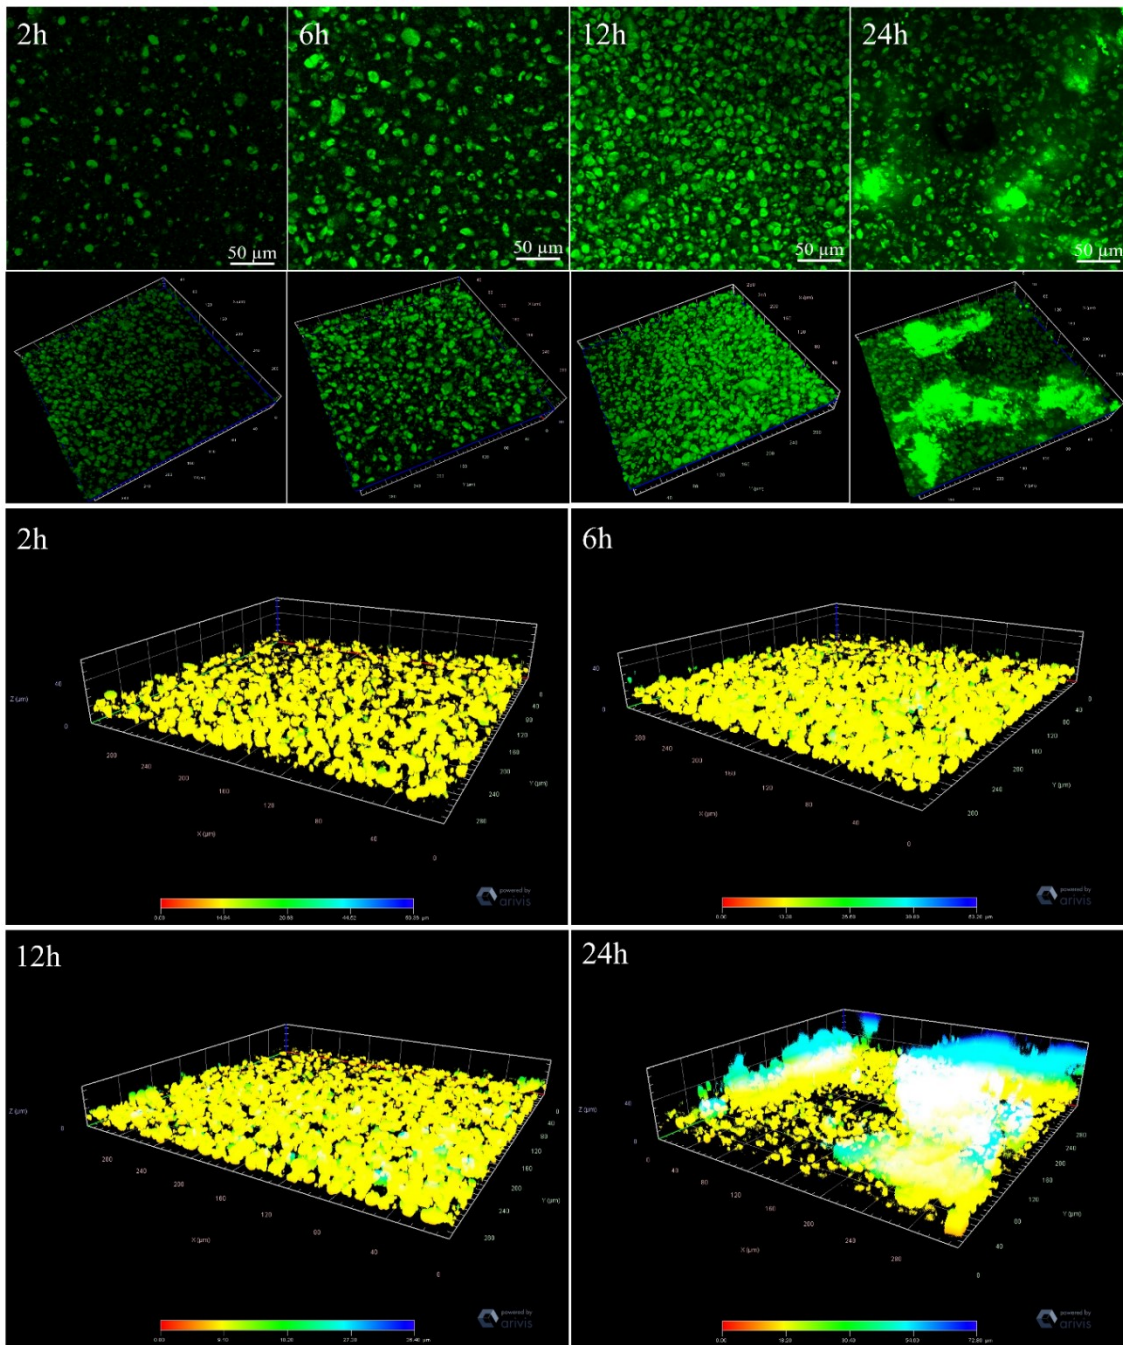

88

89 **Supplementary Figure 8.** Green fluorescent protein (GFP)-expressing *E. coli* BL21 grown to  
 90 early log phase in LB broth. Added to mucus at  $8 \times 10^7$  per well in LB and allowed to attach.  
 91 Confocal imaging of the observed biofilm on mucus at 2h, 6h, 12h and 24. Imaging performed  
 92 by confocal laser scanning microscopy on the ZEISS LSM 800 with the fluorophore as GFP on  
 93 the ZEISS Zen Blue software. Scale bar is 50 μm. 3D depth coded images are provided for the  
 94 2,6,12,24 hour timepoints corresponding to the fluorescence z-stacks above.

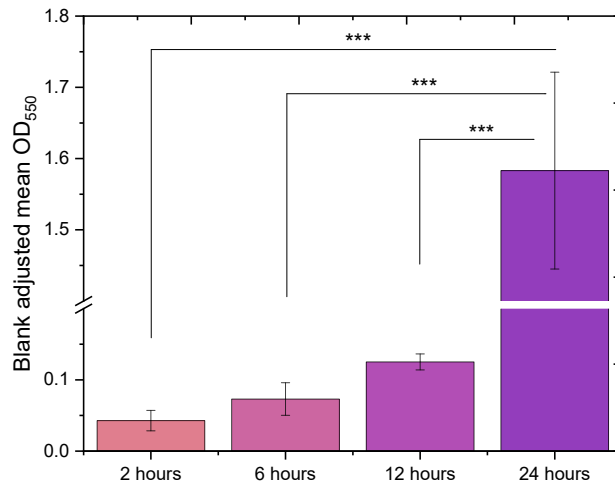

95

96 **Supplementary Figure 9.** Crystal violet microtiter assay to determine LF82 *E coli* biofilm  
 97 growth on the mucus mimic. This experiment was performed analogously to the bacterial  
 98 incubation study shown in Figure 4 of the main text. Upon reaching the growth time  
 99 investigated, bacterial suspension was removed and wells gently washed twice. Crystal violet  
 100 staining and quantification was performed according to well established procedure<sup>46</sup>.  
 101 Quantification by OD<sub>550</sub> was performed on a plate reader (BMG Labtech CLARIOstar) and all  
 102 samples were diluted equally so all wells could be quantified within the range of the detector.  
 103 Data shown are from a minimum of three technical triplicates and from three biological  
 104 replicates. \*\*\* =  $p < 0.001$ .

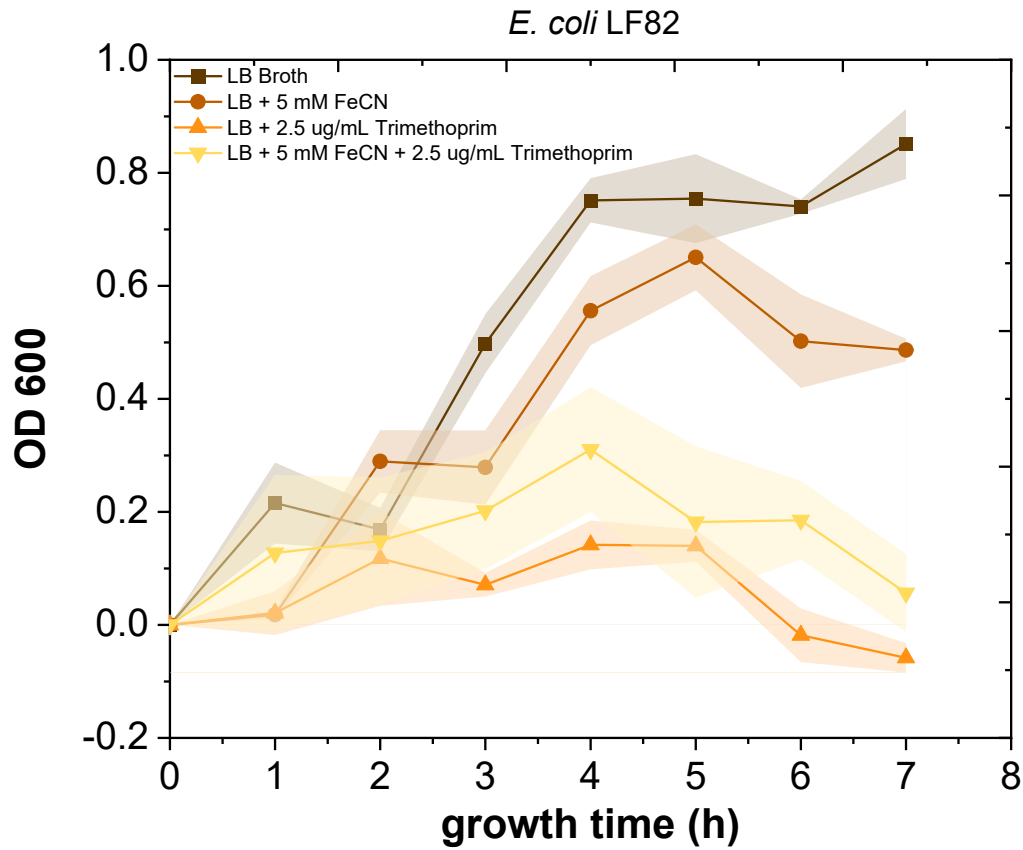

106

107 **Supplementary Figure 10.** Optical density at 600 nm as a measure of *E. coli* LF82 growth. An  
 108 overnight culture of *E. coli* LF82 was grown in LB broth and used to inoculate fresh LB broth  
 109 at 1% (v/v). Samples were collected every hour and optical density measured for seven hours  
 110 (BMG Labtech CLARIOstar). Error band denotes standard deviation, N=3.

111

112
